# Supplementary material for: Tunable electron property induced by B-doping in g-C3N4
Source: Royal Society of Chemistry journal article supplement (doi:10.1039/d1ra00149c), 2021-01-01
Supplement: d1ra00149c1.pdf [file d1ra00149c1.pdf]

Electronic Supplementary Material (ESI) for RSC Advances.

## Supplementary Information for

### Tunable electron property induced by B-doping in g-C<sub>3</sub>N<sub>4</sub>

Bo Yang<sup>a\*</sup>, Hongxia Bu<sup>b</sup>, Xiaobiao Liu<sup>c</sup>

*a. School of Science, Shandong Jianzhu University, Jinan 250101, China*

*b. College of Physics and Electronic Engineering, Qilu Normal University, Jinan  
250200, China*

*c. School of Science, Henan Agricultural University, Zhengzhou 450002,  
China*

|                                | <b>Energy(eV/atom)</b> |
|--------------------------------|------------------------|
| <b>With dispersion term</b>    | -8.249                 |
| <b>Without dispersion term</b> | -8.217                 |
| <b>difference</b>              | 0.032                  |

Table. S1 The energy of g-C<sub>6</sub>N<sub>7</sub>B with and without dispersion term.

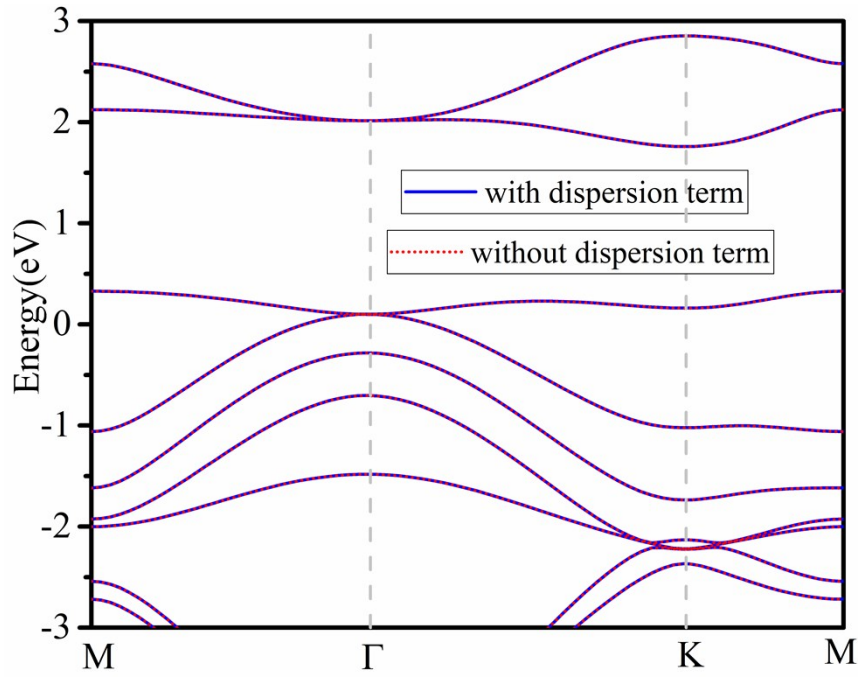

Fig. S1 The electronic band structure of g-C<sub>6</sub>N<sub>7</sub>B with and without dispersion term. The Fermi level was set as zero.

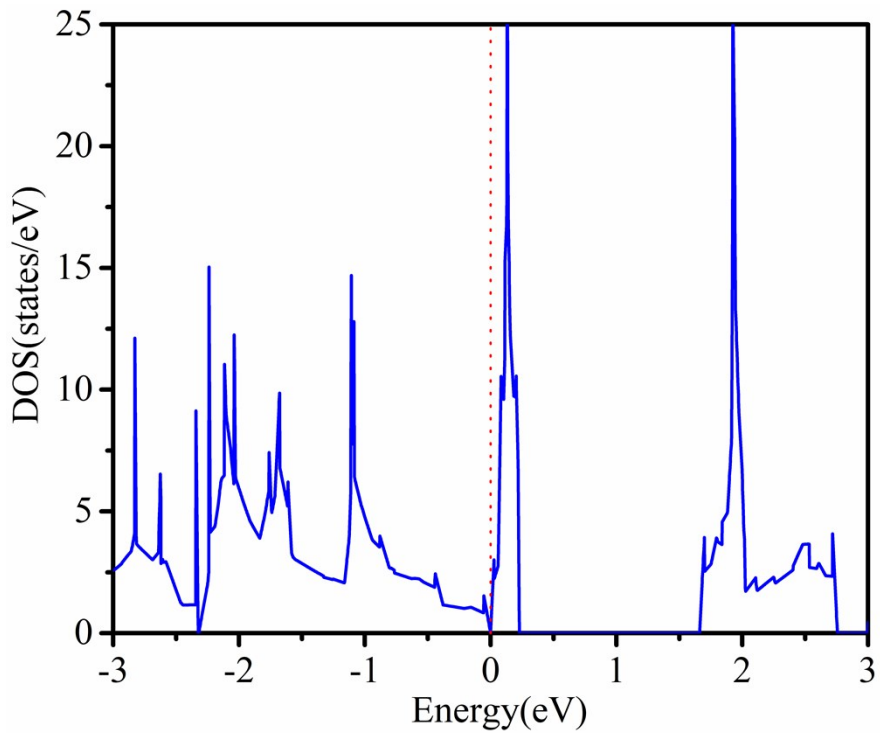

Fig S2. The total density of states of g-C<sub>6</sub>N<sub>7</sub>B, the Fermi level was set as zero

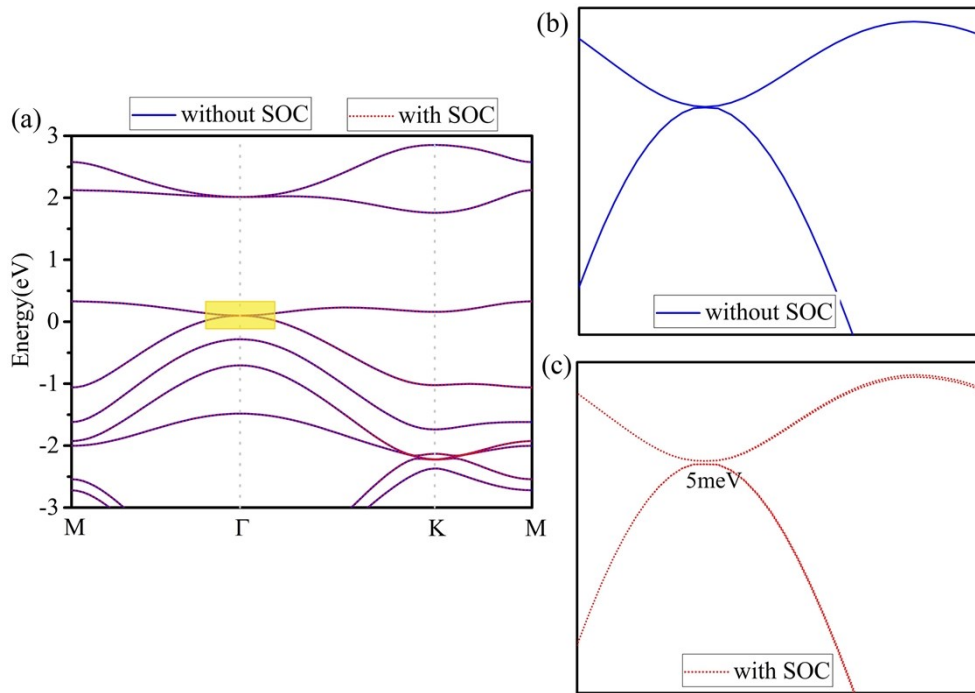

Fig S3. (a) The band structure of g-C<sub>6</sub>N<sub>7</sub>B without and with SOC, (b) and (c) is the enlarged view for the yellow part in Fig S3. (a) without and with SOC, respectively.

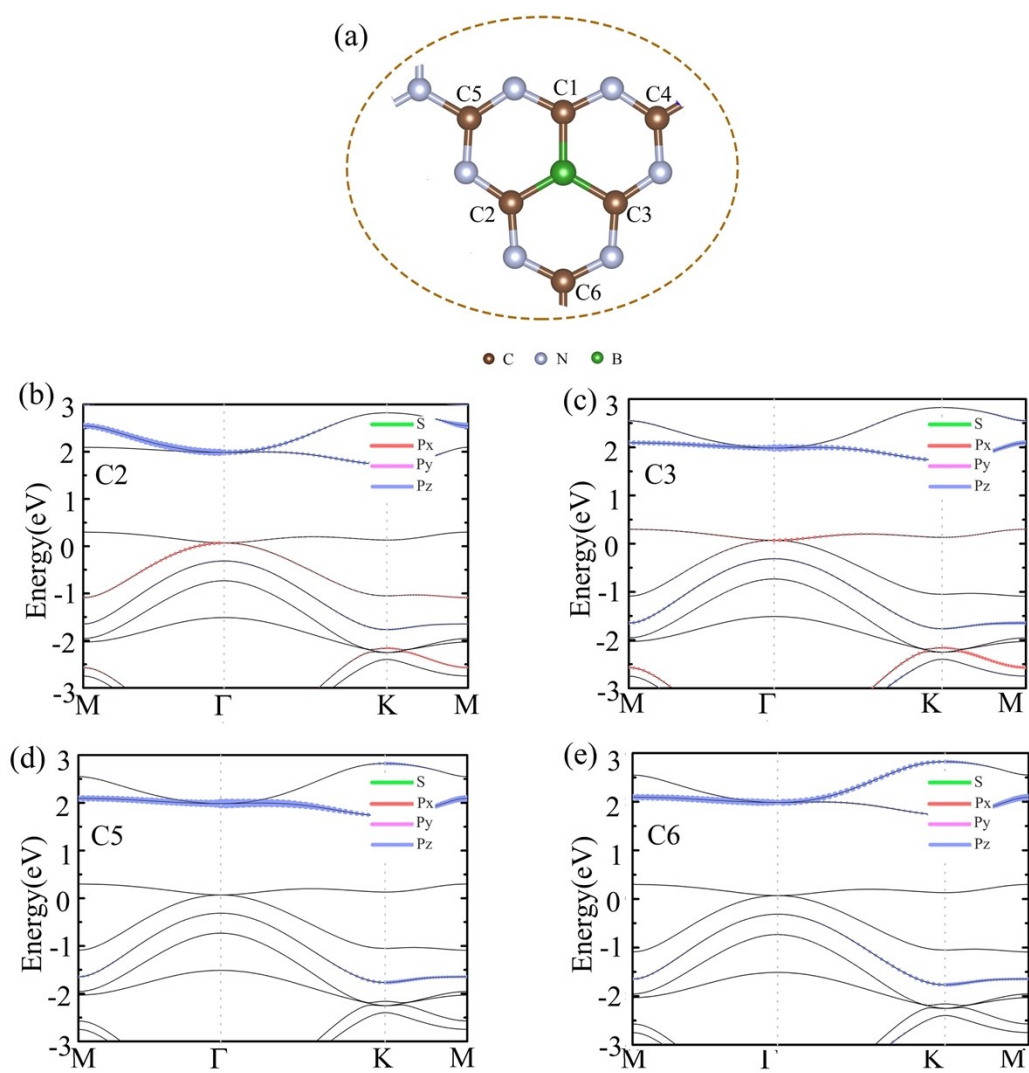

Fig. S4 (a) The geometry structure of g-C<sub>6</sub>N<sub>7</sub>B. (b)-(e) The orbital-resolved band structure of the g-C<sub>6</sub>N<sub>7</sub>B on different atoms, labelled in (a).
